# Supplementary material for: A cohort study of duplicate faecal immunochemical testing in patients at risk of colorectal cancer from North-West England
Source: HighWire-hosted journal article supplement (doi:10.1136/bmjopen-2021-059940), 2022-04-01
Supplement: bmjopen-2021-059940supp001_data_supplement.pdf [file bmjopen-2021-059940supp001_data_supplement.pdf]

Supplementary Table. Differences between pre- and post- pandemic cohort FIT performance

|                                             | Percentage Female (%) | Average age | Total patients with 2 FITs | Patients with 2 NEG FITs | Patients with 2 NEG FITs & CRC | Percentage patients with 2 NEG FITs & CRC (%) |
|---------------------------------------------|-----------------------|-------------|----------------------------|--------------------------|--------------------------------|-----------------------------------------------|
| <b>Pre COVID<br/>(April 2019-Feb 2020)</b>  | 56.3                  | 64.0        | 9907                       | 6834                     | 2                              | 0.029                                         |
| <b>Post COVID<br/>(April 2020-Feb 2021)</b> | 56.5                  | 64.0        | 16406                      | 10527                    | 4                              | 0.038                                         |
